# Supplementary material for: A two-fold interpenetrated zinc–organic framework: luminescence detection of CrO42−/Cr2O72− and chemical conversion of CO2
Source: Royal Society of Chemistry journal article supplement (doi:10.1039/c8ce00673c), 2018-01-01
Supplement: c8ce00673c1.pdf [file c8ce00673c1.pdf]

# A Two-fold Interpenetrated Zinc-Organic Framework: Luminescent Detection of $\text{CrO}_4^{2-}/\text{Cr}_2\text{O}_7^{2-}$ and Chemical Conversion of $\text{CO}_2$

Ying Shi,<sup>a</sup> Tian-Qun Song,<sup>a,b</sup> Chun-Shuai Cao<sup>a</sup> and Bin Zhao<sup>\*a</sup>

<sup>a</sup> Department of Chemistry, Key Laboratory of Advanced Energy Material Chemistry, MOE, and Collaborative Innovation Center of Chemical Science and Engineering (Tianjin), Nankai University, Tianjin 300071, China.

<sup>b</sup> Department of Chemistry, Tianjin University, Tianjin 300072, China

**Table S1.** Crystal data and structure refinement for compound **1**.

| Identification code                     | <b>1</b>                                                        |
|-----------------------------------------|-----------------------------------------------------------------|
| Empirical formula                       | $\text{C}_{23}\text{H}_{21.4}\text{N}_3\text{O}_{8.2}\text{Zn}$ |
| Formula weight                          | 536.44                                                          |
| Temperature/K                           | 120.00(10)                                                      |
| Crystal system                          | triclinic                                                       |
| Space group                             | <i>P</i> -1                                                     |
| <i>a</i> /Å                             | 10.1188(7)                                                      |
| <i>b</i> /Å                             | 10.9420(11)                                                     |
| <i>c</i> /Å                             | 11.7024(10)                                                     |
| $\alpha$ /°                             | 63.853(9)                                                       |
| $\beta$ /°                              | 82.358(6)                                                       |
| $\gamma$ /°                             | 72.588(7)                                                       |
| Volume/Å <sup>3</sup>                   | 1109.81(18)                                                     |
| <i>Z</i>                                | 2                                                               |
| $\rho_{\text{calc}}/\text{cm}^3$        | 1.579                                                           |
| $\mu/\text{mm}^{-1}$                    | 1.164                                                           |
| F(000)                                  | 535.0                                                           |
| Radiation                               | MoK $\alpha$ ( $\lambda = 0.71073$ )                            |
| 2 $\theta$ range for data collection/°  | 5.728 to 50.016                                                 |
| Index ranges                            | $-11 \leq h \leq 12, -12 \leq k \leq 13, -7 \leq l \leq 13$     |
| Independent reflections                 | 3894 [ $R_{\text{int}} = 0.0469, R_{\text{sigma}} = 0.0784$ ]   |
| Goodness-of-fit on $F^2$                | 0.941                                                           |
| Final R indexes [ $I \geq 2\sigma(I)$ ] | $R_1 = 0.0544, wR_2 = 0.1313$                                   |
| Final R indexes [all data]              | $R_1 = 0.0761, wR_2 = 0.1459$                                   |

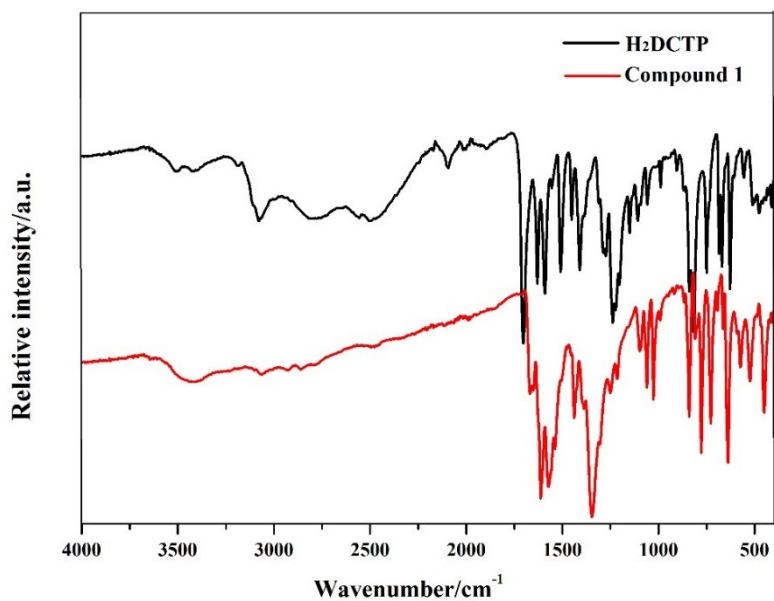

**Figure S1.** The FT-IR spectra of the ligand (black) and the compound 1 (red).

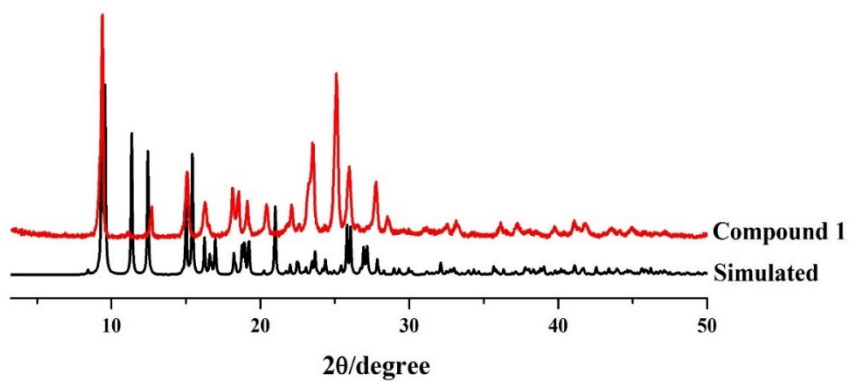

**Figure S2.** The PXRD patterns of **1**, synthesized compounds (red) and simulated from the single-crystal data (black).

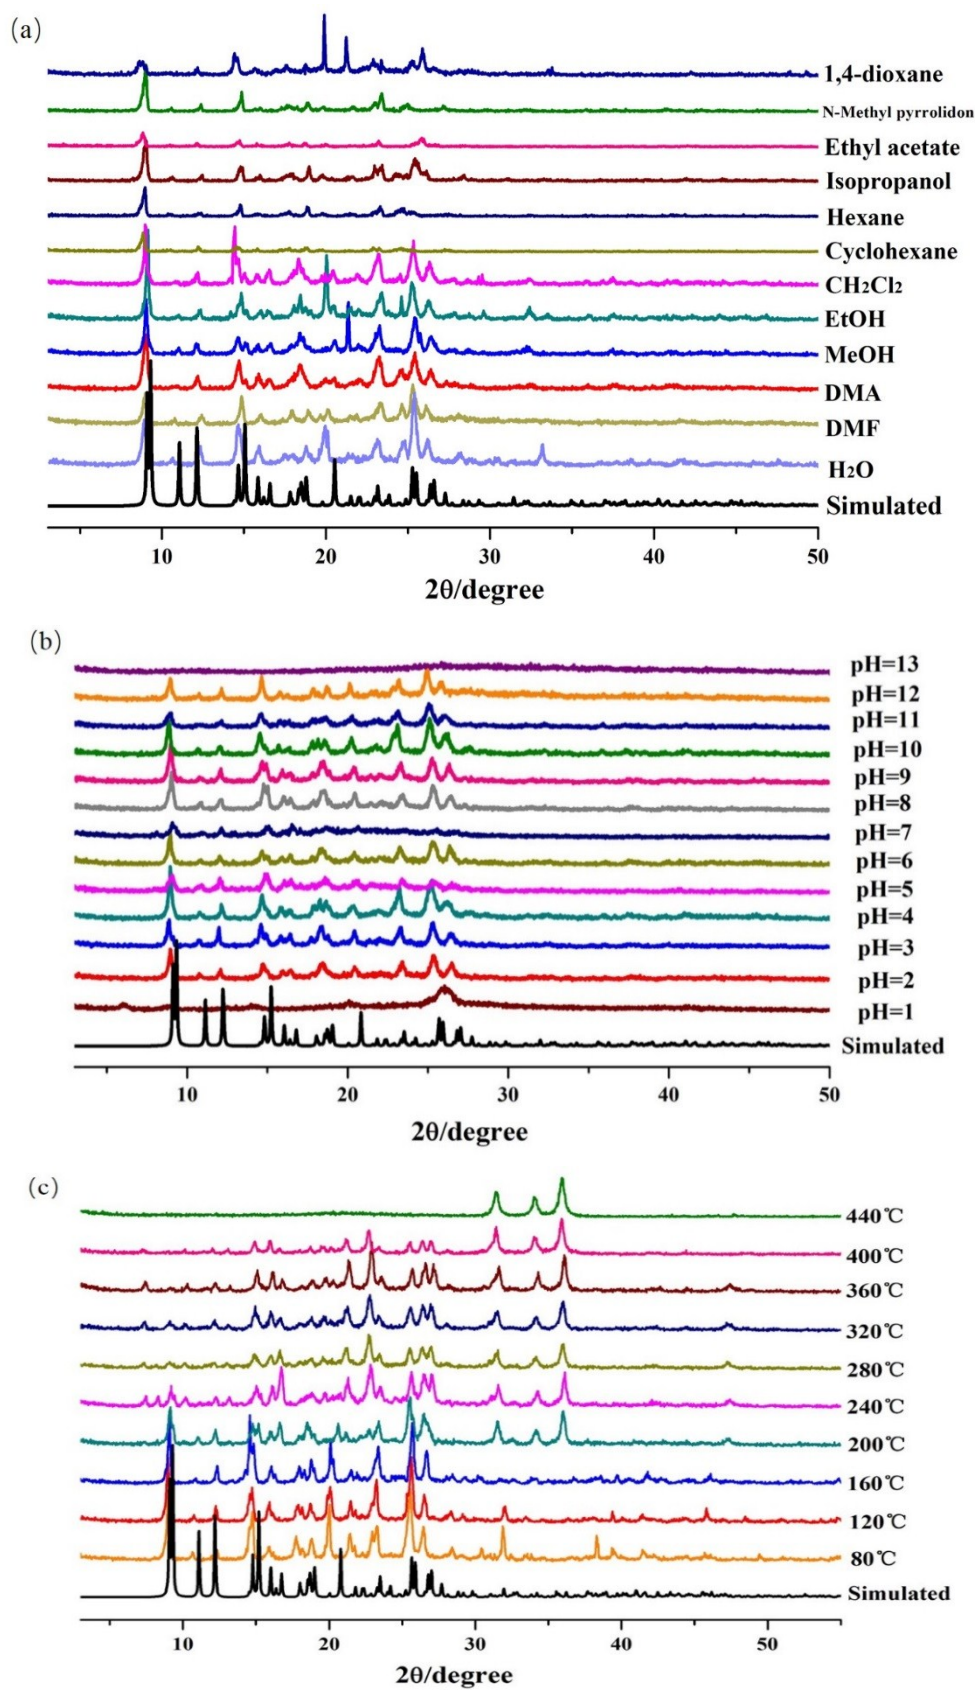

**Figure S3.** The PXRD patterns of compound **1** after immersing in various organic solvents (a) and different pH values from 1.0 to 13.0 (b); the PXRD patterns of compound **1** after heating at different temperatures (c).

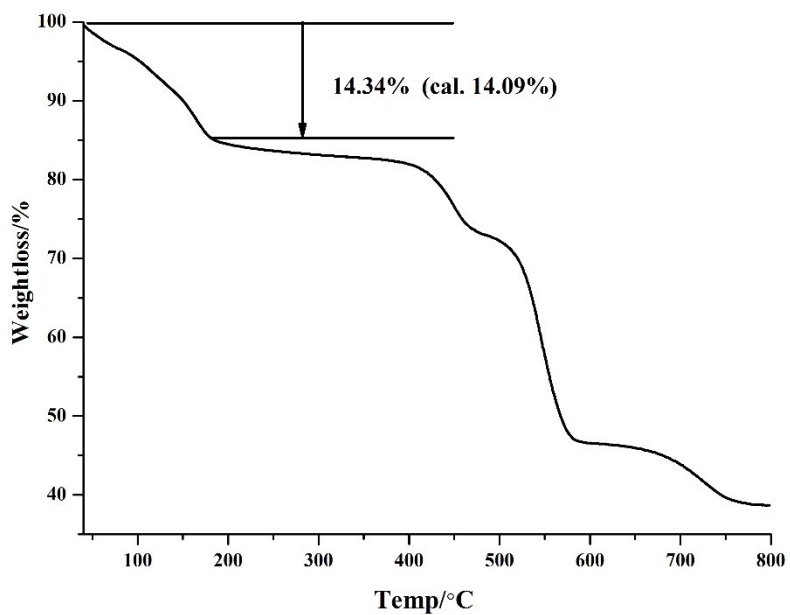

**Figure S4.** The thermogravimetric analyses curve of compound **1**, the weight loss of 14.34% is similar to the calculated value (14.09%).

4-Butyl-1,3-dioxolan-2-one  
<sup>1</sup>H NMR (300 MHz, CDCl<sub>3</sub>)

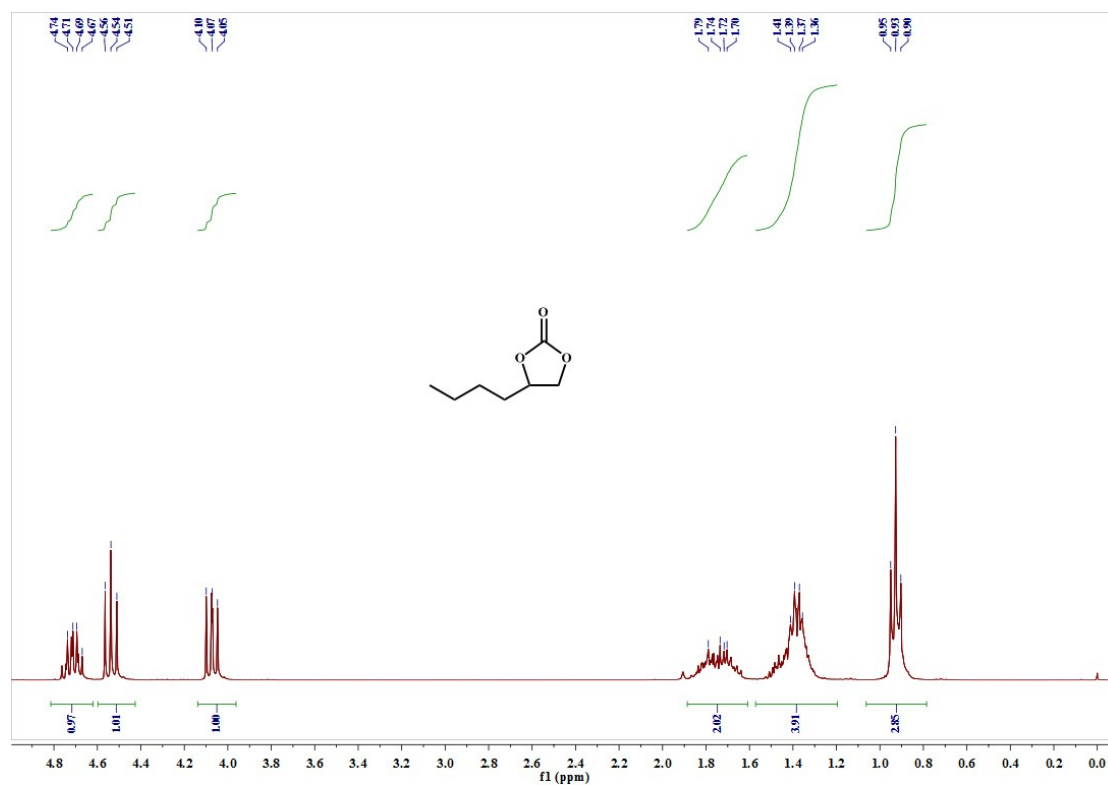

4-Phenyl-1,3-dioxolan-2-one

$^1\text{H NMR}$  (300 MHz,  $\text{CDCl}_3$ )

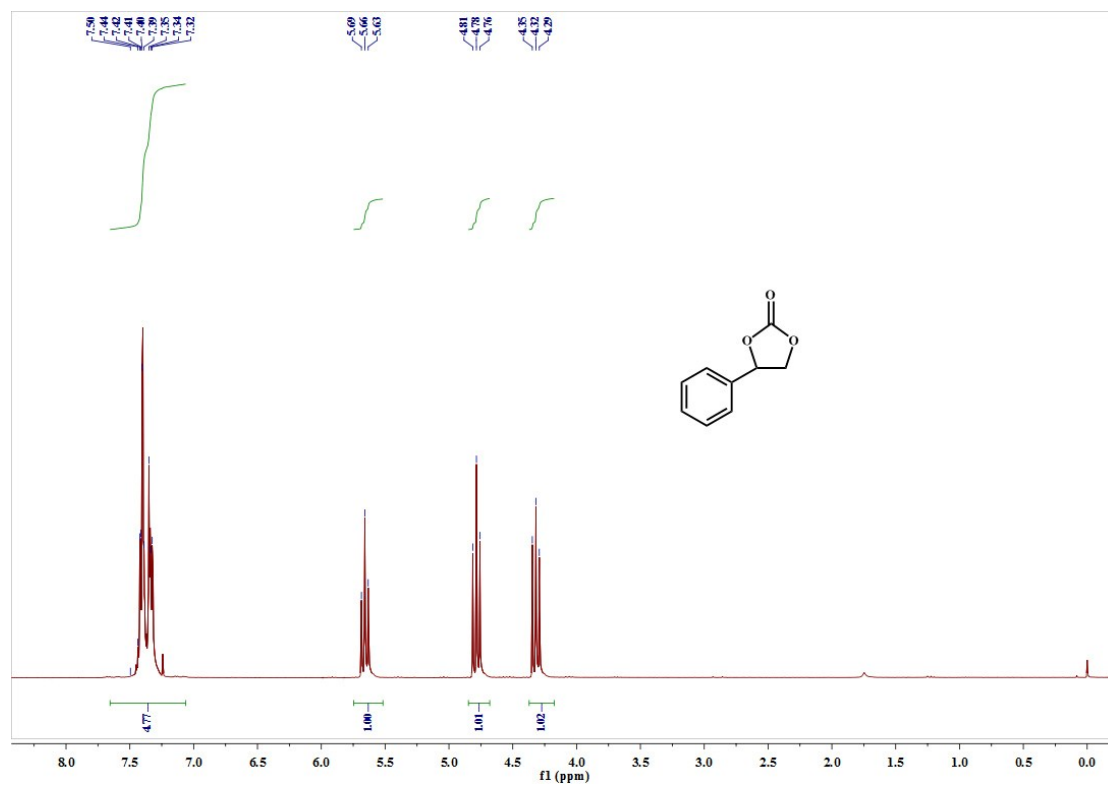

4-(Phenoxymethyl)-1,3-dioxolan-2-one

$^1\text{H NMR}$  (300 MHz,  $\text{CDCl}_3$ )

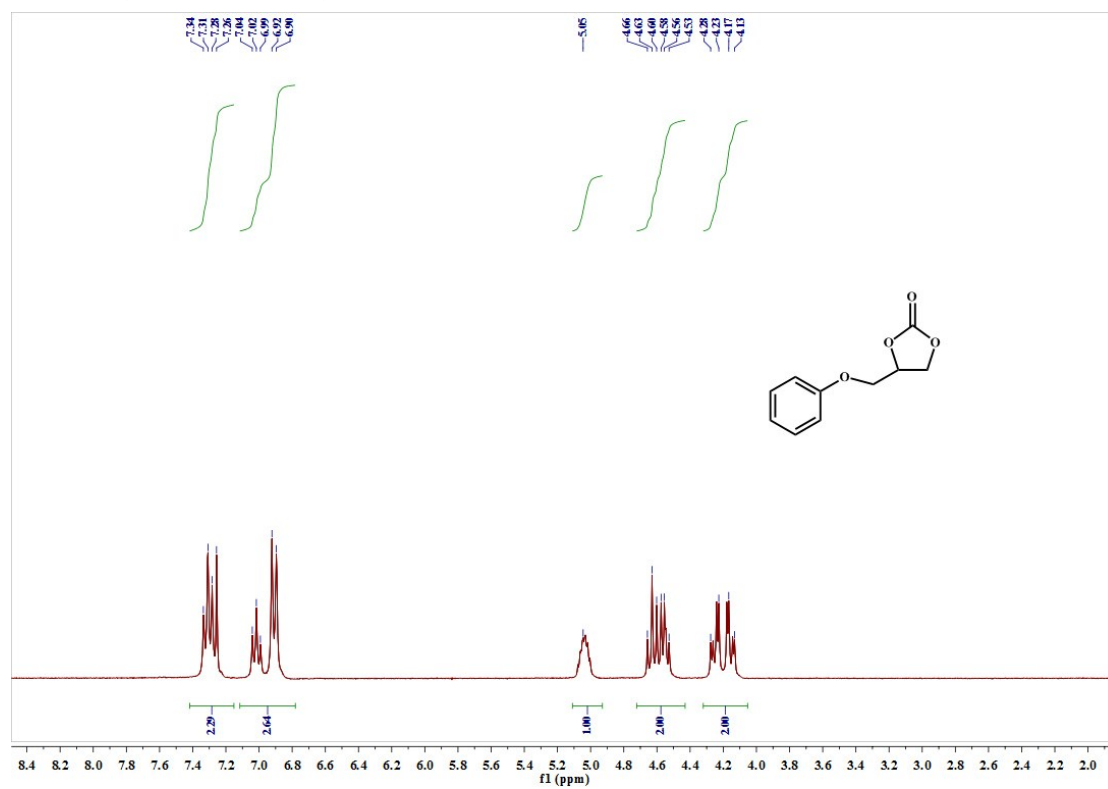

4-(Chloromethyl)-1,3-dioxolan-2-one  
 $^1\text{H}$  NMR (300 MHz,  $\text{CDCl}_3$ )

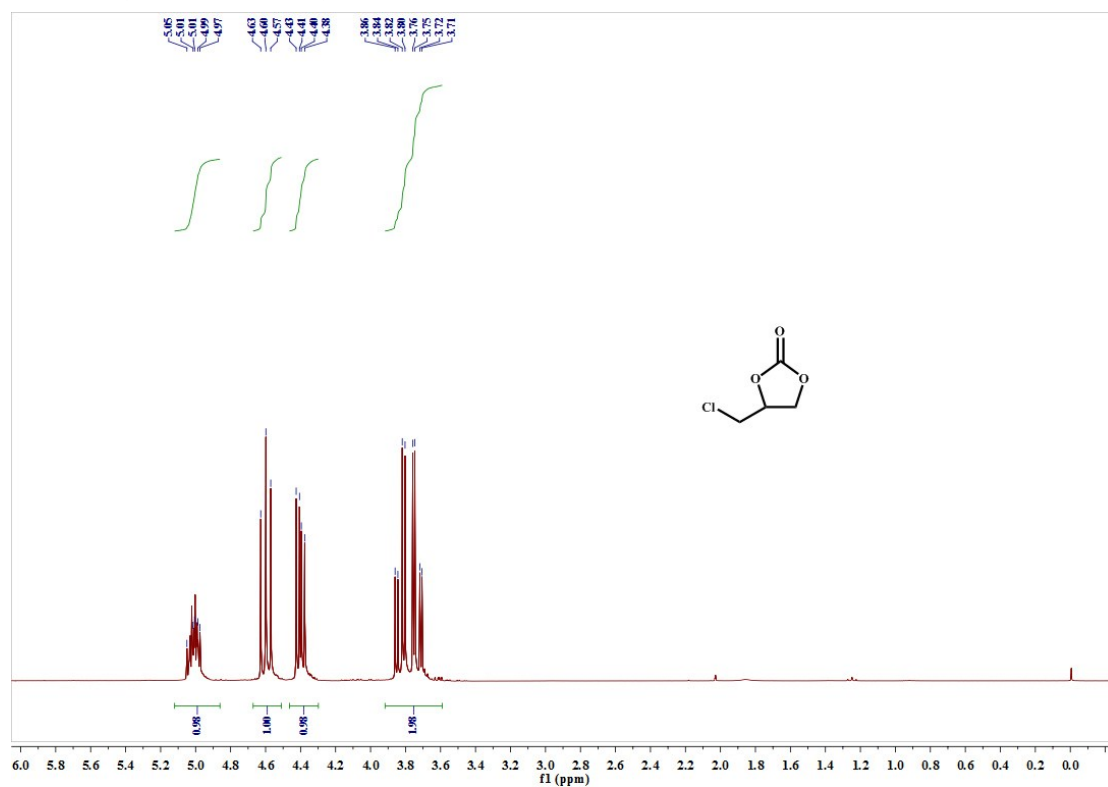

**Figure S5.** The  $^1\text{H}$  NMR plots of the products converting from the cycloaddition reaction of  $\text{CO}_2$  with epoxides.

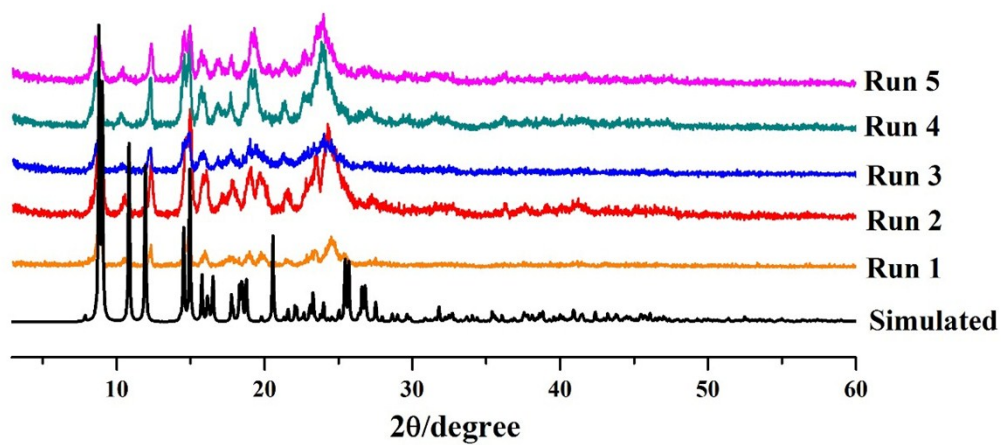

**Figure S6.** The PXRD patterns of **1** after five catalytic recyclings and the simulated one from **1**.

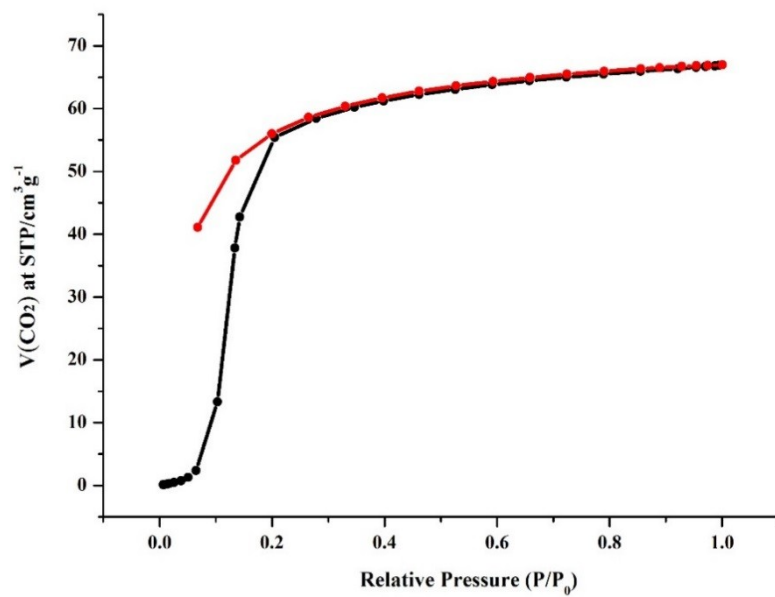

**Figure S7.** The CO<sub>2</sub> adsorption/desorption of **1** at 273 K.

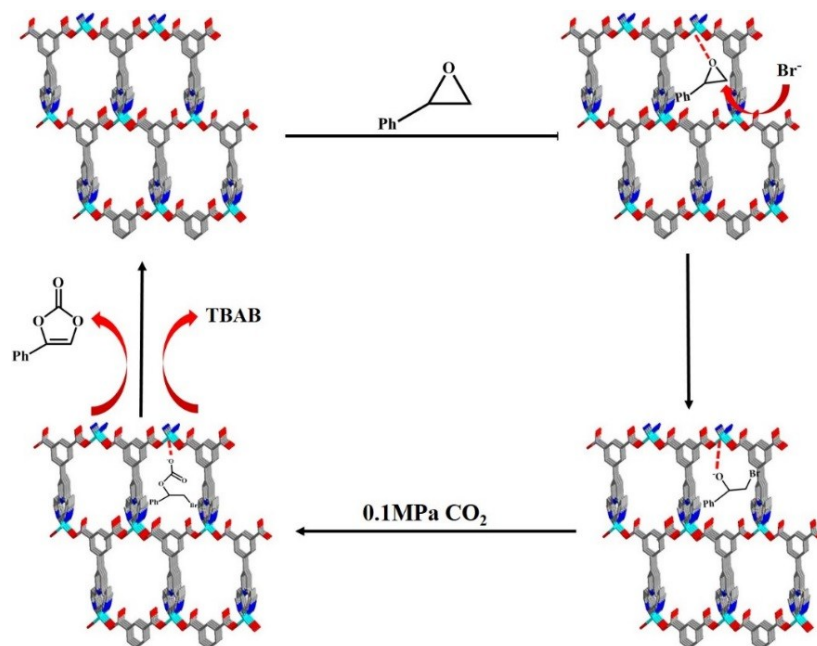

**Figure S8.** The possible mechanism for the reaction of epoxidation.

**Table S2.** Comparison of the catalytic activity of some reported interpenetrated-MOFs for the cycloaddition reaction of CO<sub>2</sub> with epoxides.

| entry          | catalyst                                                                                                                                       | interpenetrated numbers | catalyst (mol %) | pressure (Mpa) | temp (°C) | time (h) | conversion (%) | ref       |
|----------------|------------------------------------------------------------------------------------------------------------------------------------------------|-------------------------|------------------|----------------|-----------|----------|----------------|-----------|
| 1 <sup>a</sup> | [{Ni(muco)(bpa)(2H <sub>2</sub> O)}·2H <sub>2</sub> O]                                                                                         | 3-fold                  | 0.5              | 0.8            | 80        | 12       | 81.3           | 1         |
| 2 <sup>a</sup> | [Co(muco)(bpa)(2H <sub>2</sub> O)]·2H <sub>2</sub> O] <sub>n</sub>                                                                             | 3-fold                  | 0.5              | 0.8            | 80        | 12       | >99            | 2         |
|                |                                                                                                                                                |                         | 0.5              | 0.1            | 80        | 12       | 85.6           |           |
|                |                                                                                                                                                |                         | 0.5              | 0.1            | 100       | 15       | 94.2           |           |
| 3 <sup>a</sup> | [Zn <sub>6</sub> (TATAB) <sub>4</sub> (DABCO) <sub>3</sub> -(H <sub>2</sub> O) <sub>3</sub> ]·12DMF·9H <sub>2</sub> O                          | 3-fold                  | 0.42             | 0.1            | 100       | 16       | 90             | 3         |
| 4 <sup>a</sup> | {[Zn(DCTP)]·3H <sub>2</sub> O} <sub>n</sub>                                                                                                    | 2-fold                  | 2.8              | 0.1            | 70        | 12       | 88             | this work |
| 5 <sup>a</sup> | [Zn <sub>4</sub> OL <sub>3</sub> ] <sub>n</sub>                                                                                                | 2-fold                  | 0.3              | 0.1            | 50        | 4        | 55             | 4         |
| 6 <sup>b</sup> | MMPF-18                                                                                                                                        | 4-fold                  | 0.25             | 0.1            | r.t.      | 48       | 96.97          | 5         |
| 7 <sup>b</sup> | [Cu(bpy) <sub>2</sub> (EDS)] <sub>n</sub>                                                                                                      | 2-fold                  | 1.0              | 0.1            | r.t.      | 48       | >99            | 6         |
| 8 <sup>b</sup> | {Cu <sub>2</sub> ((C <sub>57</sub> H <sub>36</sub> N <sub>12</sub> )(COO) <sub>4</sub> -(H <sub>2</sub> O) <sub>2</sub> ·22(DMF)) <sub>n</sub> | 2-fold                  | 0.4              | 0.1            | r.t.      | 60       | 94             | 7         |
|                | {Cu <sub>2</sub> ((C <sub>57</sub> H <sub>36</sub> N <sub>12</sub> )(COO) <sub>4</sub> -(H <sub>2</sub> O) <sub>2</sub> ·7(DMF)) <sub>n</sub>  | 4-fold                  | 0.4              | 0.1            | r.t.      | 60       | 49             |           |

<sup>a</sup> The epoxide is styrene oxide, <sup>b</sup> The epoxide is propylene oxide.

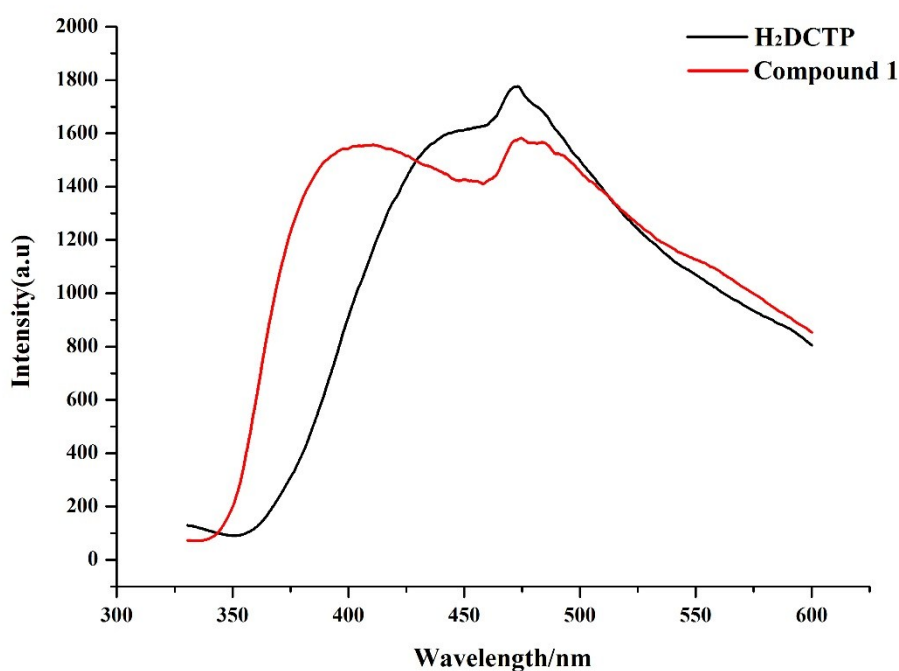

**Figure S9.** The solid-state photoluminescence spectra of H<sub>2</sub>DCTP ( $\lambda_{\text{excited}} = 320$  nm) and the emission spectra of compound **1** ( $\lambda_{\text{excited}} = 320$  nm).



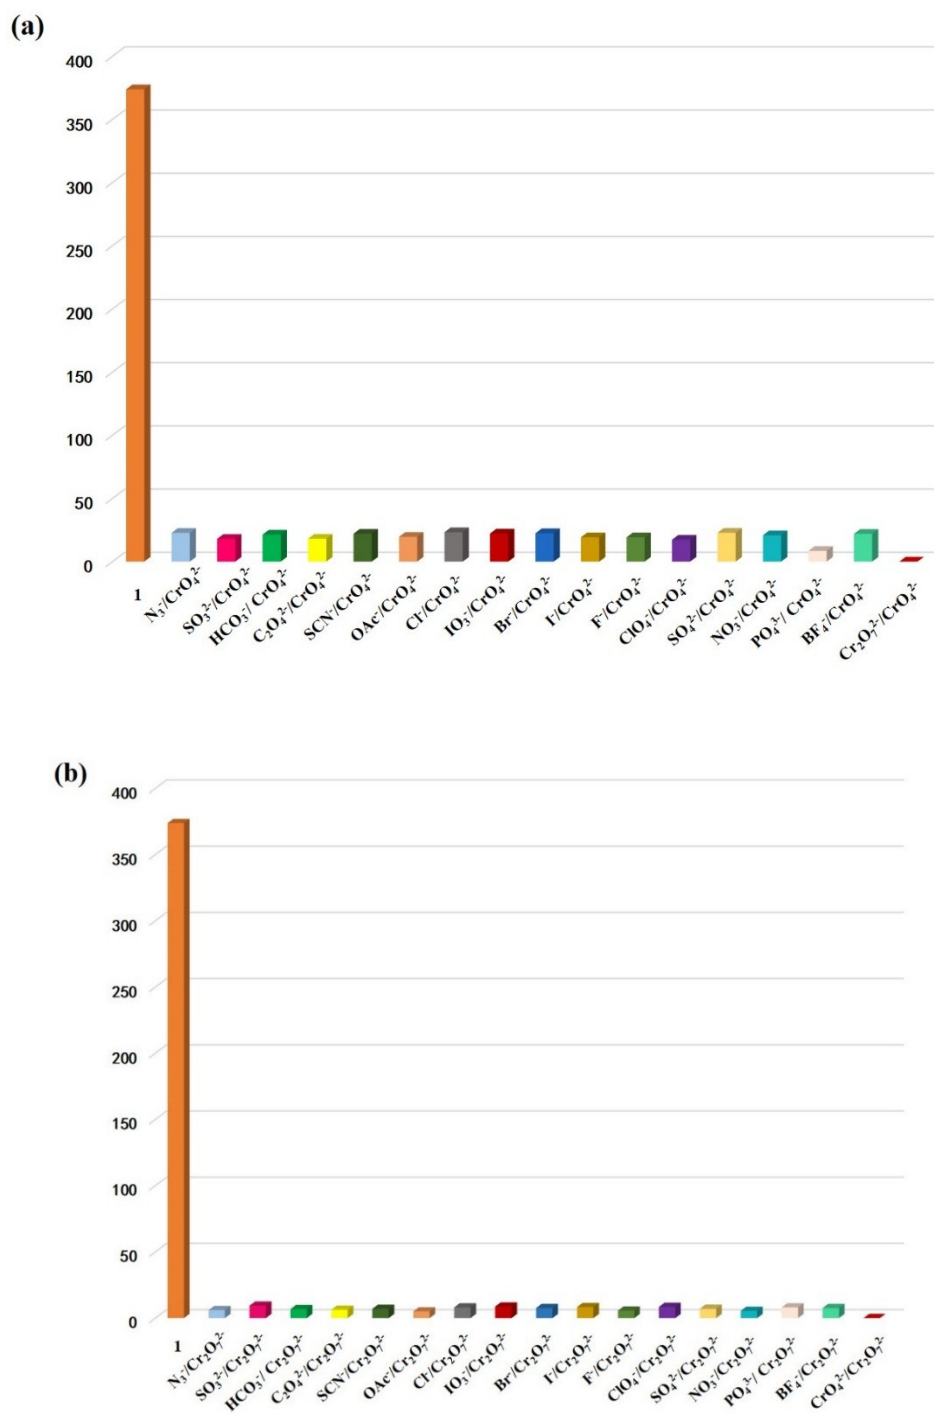

**Figure S10.** The luminescence intensity of **1**-CrO<sub>4</sub><sup>2-</sup> (a) and **1**-Cr<sub>2</sub>O<sub>7</sub><sup>2-</sup> (b) under mixed anions (5×10<sup>-3</sup> M).

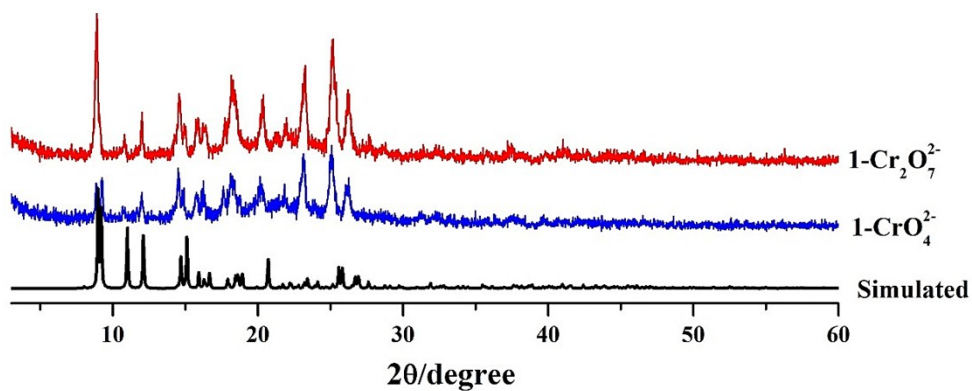

**Figure S11.** The PXRD patterns of **1** after five luminescent recyclings and the simulated one from compound **1**.

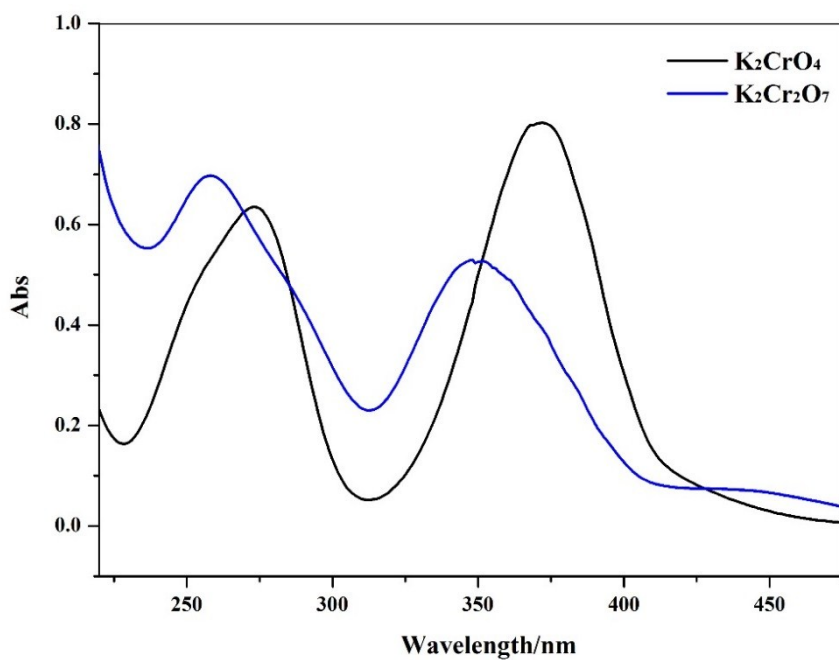

**Figure S12.** The UV-vis spectra of the K<sub>2</sub>CrO<sub>4</sub> and K<sub>2</sub>Cr<sub>2</sub>O<sub>7</sub> solutions.

**Table S3.** Comparison of the detective limit in some reported  $\text{CrO}_4^{2-}/\text{Cr}_2\text{O}_7^{2-}$  sensors.

| entry | molecular formula                                                                                                                                     | analyte( $\text{CrO}_4^{2-}/\text{Cr}_2\text{O}_7^{2-}$ ) | LOD(mol/L)                                | ref       |
|-------|-------------------------------------------------------------------------------------------------------------------------------------------------------|-----------------------------------------------------------|-------------------------------------------|-----------|
| 1     | $[\text{Y}(\text{BTC})(\text{H}_2\text{O})_6]_n \cdot 0.1\text{Eu}$                                                                                   | $\text{CrO}_4^{2-}/\text{Cr}_2\text{O}_7^{2-}$            | $3.0 \times 10^{-8}/4.0 \times 10^{-8}$   | 8         |
| 2     | $\text{Eu}^{3+}@\text{MIL}-121$                                                                                                                       | $\text{Cr}_2\text{O}_7^{2-}$                              | $5.4 \times 10^{-8}$                      | 9         |
| 3     | $\{[\text{Tb}_4\text{Mn}(\text{BPDC})_3(\mu_3\text{-H})_4(\text{HCOO})_{1.5}(\text{H}_2\text{O})_4] \cdot 2.5\text{OH} \cdot 8\text{H}_2\text{O}\}_n$ | $\text{Cr}_2\text{O}_7^{2-}$                              | $10^{-7}$                                 | 10        |
| 4     | $\{[\text{Zn}_3(\text{bpanth})(\text{oba})_3] \cdot 2\text{DMF}\}_n$                                                                                  | $\text{CrO}_4^{2-}/\text{Cr}_2\text{O}_7^{2-}$            | $1.54 \times 10^{-6}/2.38 \times 10^{-6}$ | 11        |
| 5     | $\{[\text{Zn}(\text{DCTP})] \cdot 2.5\text{H}_2\text{O}\}_n$                                                                                          | $\text{CrO}_4^{2-}/\text{Cr}_2\text{O}_7^{2-}$            | $1.0 \times 10^{-6}/1.5 \times 10^{-6}$   | this work |
| 6     | $[\text{Cd}(\text{IPA})(\text{L})]_n$                                                                                                                 | $\text{CrO}_4^{2-}/\text{Cr}_2\text{O}_7^{2-}$            | $2.52 \times 10^{-6}/2.26 \times 10^{-6}$ | 12        |
|       | $[\text{Zn}(\text{IPA})(\text{L})]_n$                                                                                                                 | $\text{CrO}_4^{2-}/\text{Cr}_2\text{O}_7^{2-}$            | $1.83 \times 10^{-5}/1.2 \times 10^{-5}$  |           |
| 7     | $\{[\text{Zn}_3(\text{tza})_2(\mu_2\text{-OH})_2(\text{H}_2\text{O})_2] \cdot \text{H}_2\text{O}\}_n$                                                 | $\text{CrO}_4^{2-}/\text{Cr}_2\text{O}_7^{2-}$            | $4.0 \times 10^{-6}/1.0 \times 10^{-6}$   | 13        |
| 8     | $[\text{Zn}_2(\text{TPOM})(\text{NH}_2\text{-BDC})_2] \cdot 4\text{H}_2\text{O}$                                                                      | $\text{CrO}_4^{2-}/\text{Cr}_2\text{O}_7^{2-}$            | $4.8 \times 10^{-6}/3.9 \times 10^{-6}$   | 14        |
| 9     | $\{[\text{Zn}(\text{btz})]_n\}$                                                                                                                       | $\text{CrO}_4^{2-}/\text{Cr}_2\text{O}_7^{2-}$            | $1.0 \times 10^{-5}/2.0 \times 10^{-6}$   | 15        |
|       | $\{[\text{Zn}_2(\text{tz})\text{H}_2\text{O}]_n\}$                                                                                                    | $\text{CrO}_4^{2-}/\text{Cr}_2\text{O}_7^{2-}$            | $2.0 \times 10^{-5}/2.0 \times 10^{-5}$   |           |
| 10    | $\{[\text{Cd}(\text{L})(\text{BPDC})] \cdot 2\text{H}_2\text{O}\}_n$                                                                                  | $\text{Cr}_2\text{O}_7^{2-}$                              | $3.76 \times 10^{-5}$                     | 16        |
|       | $\{[\text{Cd}(\text{L})(\text{SDBA})(\text{H}_2\text{O})] \cdot 0.5\text{H}_2\text{O}\}_n$                                                            | $\text{Cr}_2\text{O}_7^{2-}$                              | $4.86 \times 10^{-5}$                     |           |

**Table S4.** The ICP results of compound **1** after catalytic recyclings (filter liquor) and luminescent recyclings (solid sample), respectively.

|                                                                                                                              | Compound <b>1</b>     |
|------------------------------------------------------------------------------------------------------------------------------|-----------------------|
| Compound <b>1</b> after recyclings<br>( $\text{Zn}^{2+}$ of filter liquor)                                                   | 0.68 ppm              |
| Compound <b>1</b> as $\text{CrO}_4^{2-}$ sensor after<br>luminescent recyclings ( $\text{Cr}^{6+}$ of solid sample)          | Below detection limit |
| Compound <b>1</b> as $\text{Cr}_2\text{O}_7^{2-}$ sensor after<br>luminescent recyclings ( $\text{Cr}^{6+}$ of solid sample) | Below detection limit |

**References**

- 1 B. Ugale, S. S. Dhankhar, C. M. Nagaraja, *Inorg. Chem.*, 2016, 55, 9757-9766.
- 2 B. Ugale, S. S. Dhankhar, C. M. Nagaraja, *Cryst. Growth Des.*, 2017, 17, 3295-3305.
- 3 Y. H. Han, Z. Y. Zhou, C. B. Tian, S. W. Du, *Green Chem.*, 2016, 18, 4086-4091.
- 4 J. W. Li, Y. W. Ren, C. R. Qi, H. F. Jiang, *Eur. J. Inorg. Chem.*, 2017, 1478-1487.
- 5 W. Y. Gao, C. Y. Tsai, L. Wojtas, T. Thiounn, C. C. Lin, S. Q. Ma, *Inorg. Chem.*, 2016, 55, 7291-7294.
- 6 G. Y. Zhang, G. F. Wei, Z. P. Liu, S. R. J. Oliver, H. H. Fei, *Chem. Mater.*, 2016, 28, 6276-6281.

- 7 P. Z. Li, X. J. Wang, J. Liu, J. Liang, J. Y. J. Chen, Y. L. Zhao, *CrystEngComm*, 2017, 19, 4157-4161
- 8 T. W. Duan, B. Yan, H. Weng, *Microporous and Mesoporous Materials*, 2015, 217, 196-202.
- 9 J. N. Hao, B. Yan, *New J. Chem.*, 2016, 40, 4654-4661.
- 10 J. Dong, H. Xu, S. L. Hou, Z. L. Wu, B. Zhao, *Inorg. Chem.*, 2017, 56, 6244-6250.
- 11 Z. Q. Yao, G. Y. Li, J. Xu, T. L. Hu, X. H. Bu, *Chem. Eur. J.*, 2018, 24, 3192-3198.
- 12 B. Parmar, Y. Rachuri, K. K. Bisht, R. Laiya, E. Suresh, *Inorg. Chem.*, 2017, 56, 2627-2638.
- 13 T. Q. Song, J. Dong, H. L. Gao, J. Z. Cui, B. Zhao, *Dalton Trans.*, 2017, 46, 13862-13868.
- 14 R. Lv, J. Y. Wang, Y. P. Zhang, H. Li, L. Y. Yang, S. Y. Liao, W. Gu, X. Liu, *J. Mater. Chem. A*, 2016, 4, 15494-15500.
- 15 C. S. Cao, H. C. Hu, H. Xu, W. Z. Qiao, B. Zhao, *CrystEngComm*, 2016, 18, 4445-4451.
- 16 S. G. Chen, Z. Z. Shi, L. Qin, H. L. Jia, H. G. Zheng, *Cryst. Growth Des.*, 2017, 17, 67-72.
